# Supplementary material for: Evolution of Patient Perceptions of Psoriatic Disease: Results from the Understanding Psoriatic Disease Leveraging Insights for Treatment (UPLIFT) Survey
Source: Springer Nature journal article supplement (doi:10.1007/s13555-021-00635-4), 2021-10-25
Supplement: MOESM1 [file 19796150]

**Evolution of Patient Perceptions of Psoriatic Disease: Results From the  
Understanding Psoriatic Disease Leveraging Insights for Treatment (UPLIFT)  
Survey**

Mark Lebwohl, MD<sup>1</sup>; Richard G. Langley, MD<sup>2</sup>; Carle Paul, MD, PhD<sup>3</sup>; Lluís Puíg, MD, PhD<sup>4</sup>; Kristian Reich, MD, PhD<sup>5</sup>; Peter van der Kerkhof, MD, PhD<sup>6</sup>; Hsiuan-Lin Wu, MS<sup>7</sup>; Sven Richter, MD<sup>7</sup>; Shauna Jardon, PharmD<sup>7</sup>; Paolo Gisondi, MD<sup>8</sup>

<sup>1</sup>Department of Dermatology, Icahn School of Medicine at Mount Sinai, New York, NY, USA; <sup>2</sup>Division of Dermatology, Department of Medicine, Dalhousie University, Halifax, Canada; <sup>3</sup>Department of Dermatology, Paul Sabatier University, Toulouse, France;

<sup>4</sup>Department of Dermatology, Hospital de la Santa Creu i Sant Pau, Universitat Autònoma de Barcelona, Barcelona, Spain; <sup>5</sup>Center for Translational Research in Inflammatory Skin Diseases, Institute for Health Services Research in Dermatology and Nursing, University Medical Center Hamburg-Eppendorf, Hamburg, Germany;

<sup>6</sup>Department of Dermatology, Radboud University Medical Center, Nijmegen, Netherlands; <sup>7</sup>Amgen Inc., Thousand Oaks, CA, USA; <sup>8</sup>Section of Dermatology and Venereology, University Hospital of Verona, Verona, Italy

**Corresponding author:** Mark Lebwohl, MD, Department of Dermatology, Icahn School of Medicine at Mount Sinai, 1 Gustave L. Levy Place, Box 1048, New York, NY 10029.

E-mail: [lebwohl@aol.com](mailto:lebwohl@aol.com).

**Supplementary Figure 1.** Mean DLQI Question Scores in Patients With PsO in  $\geq 1$  Special Area and by Special Area Involvement

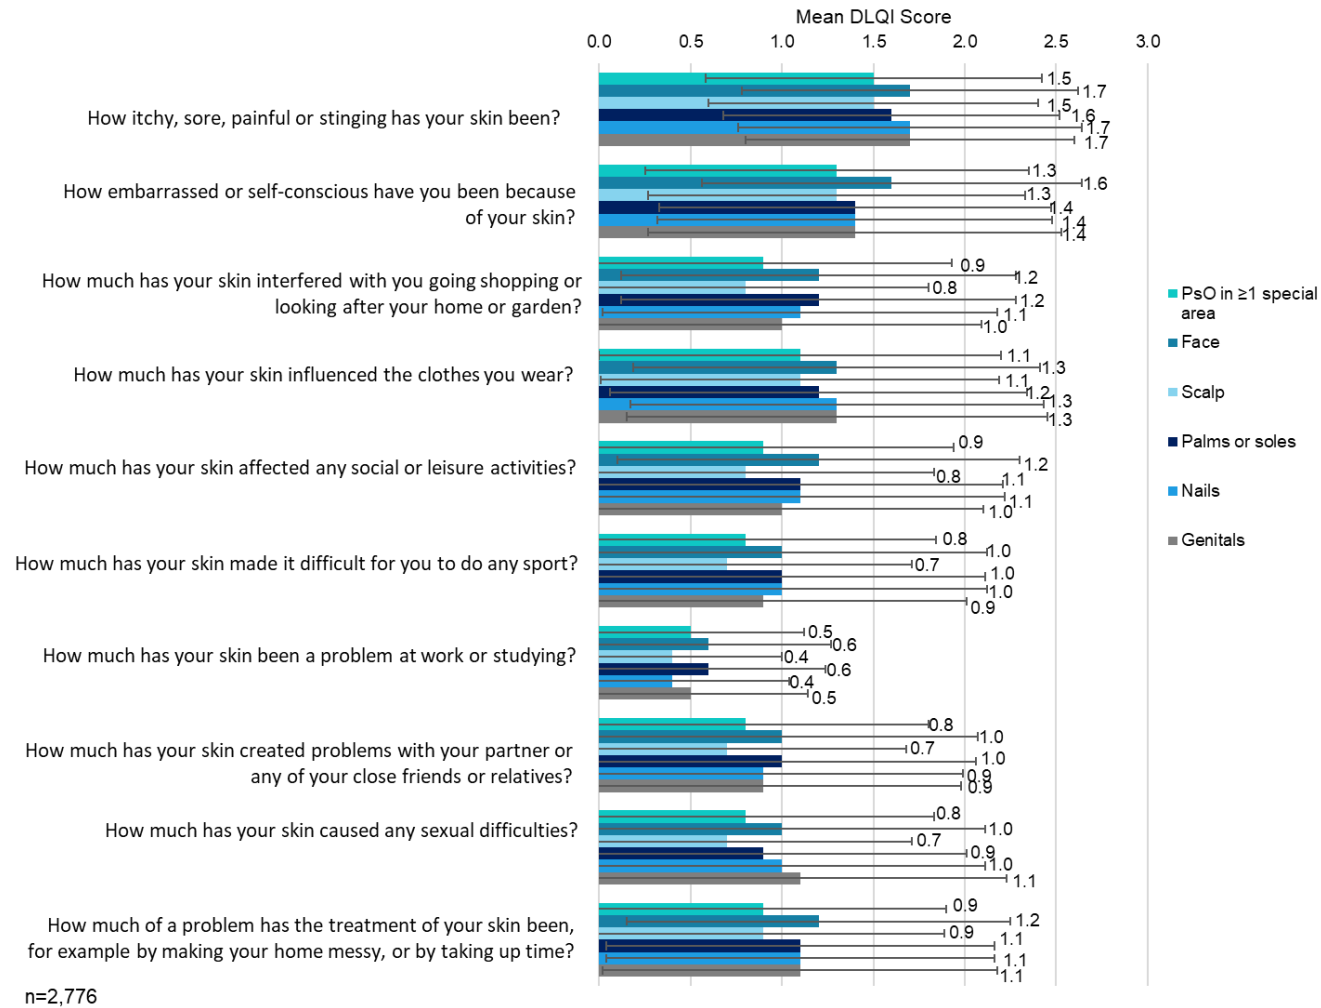

Error bars represent standard deviation.  
DLQI= Dermatology Life Quality Index; PsO=psoriasis.

**Supplementary Figure 2.** Patient and Dermatologist Perceptions of PsO Severity and Treatment

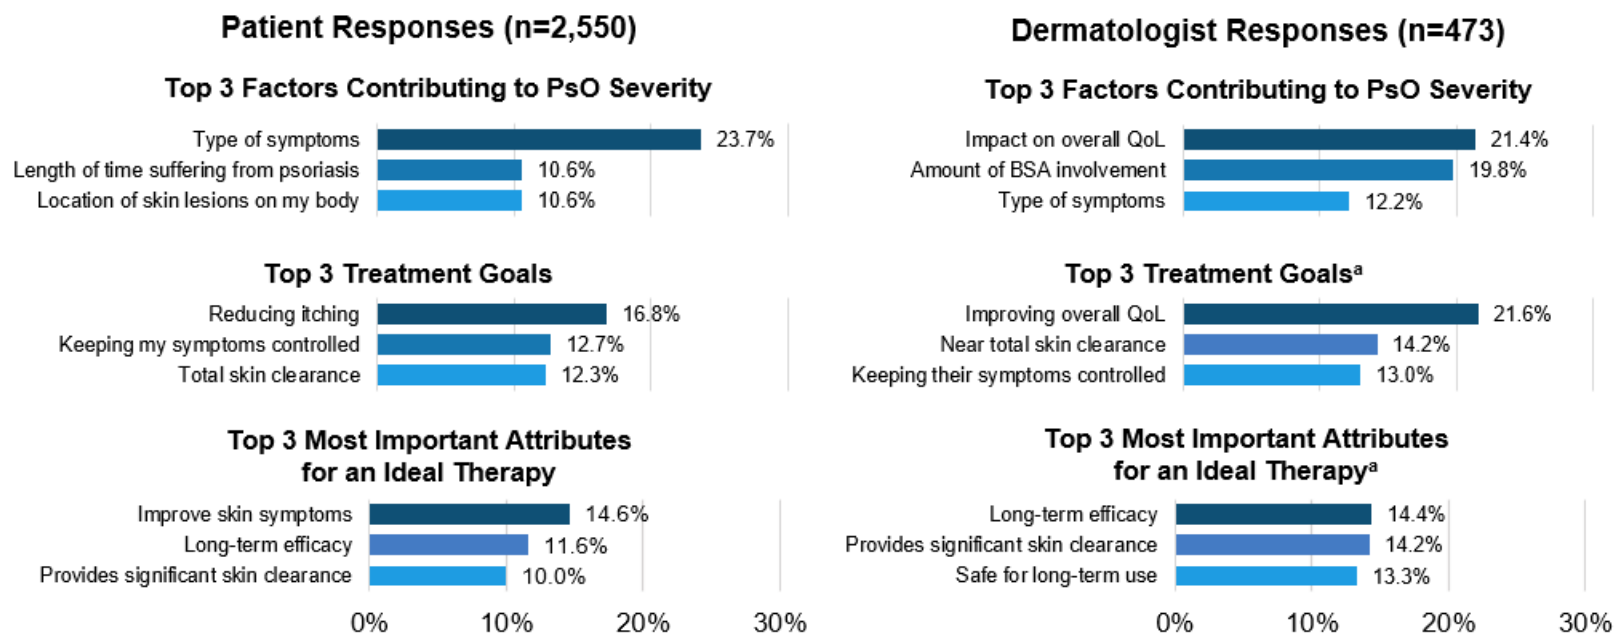

Highest-ranking responses were calculated using the sum of scores. Percentages were calculated by dividing the sum of scores by the maximum possible score.

<sup>a</sup>Separate responses were provided regarding patients in different severity categories (mild, moderate, or severe in the dermatologist’s estimation). Shown is the aggregate of the three categories.

BSA=psoriasis-involved body surface area; PsO=psoriasis.

### Supplementary Figure 3. Patient and Dermatologist Perceptions About Office Visit Discussions

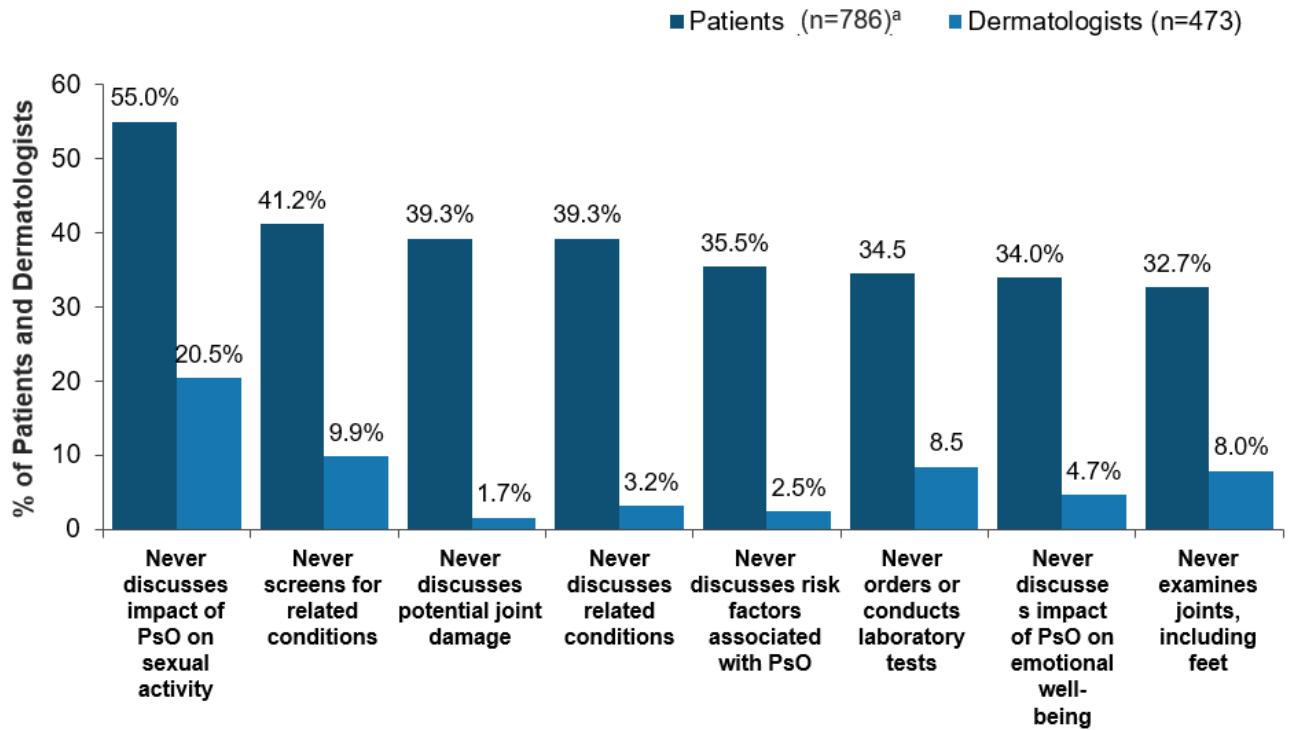

<sup>a</sup>Of 2,550 patients with PsO, 786 reported they visited the dermatologist and answered this question.

PsO=psoriasis.

**Supplementary Figure 4.** Reasons for Perceived Burden of A) Topical, B) Oral, and C) Injectable or Intravenous PsO Treatments

A. Topical

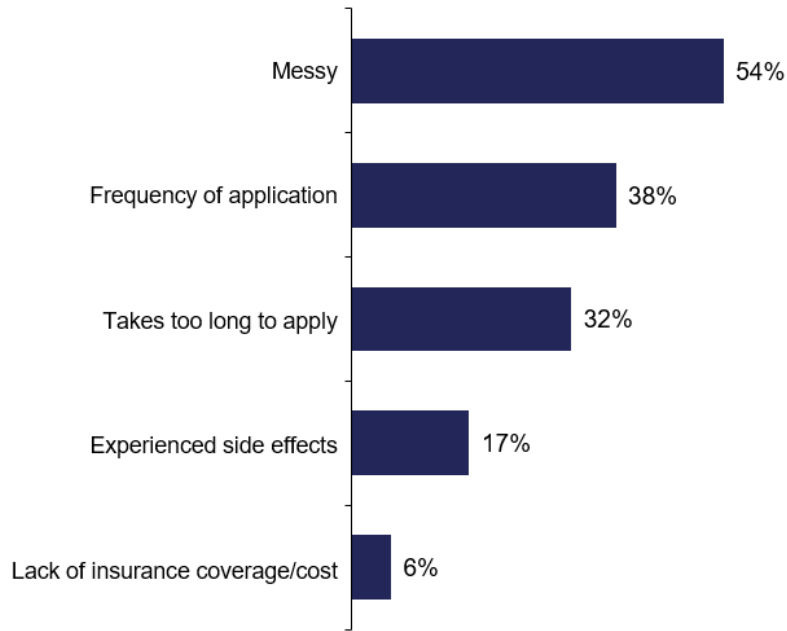

n=2,340

B. Oral

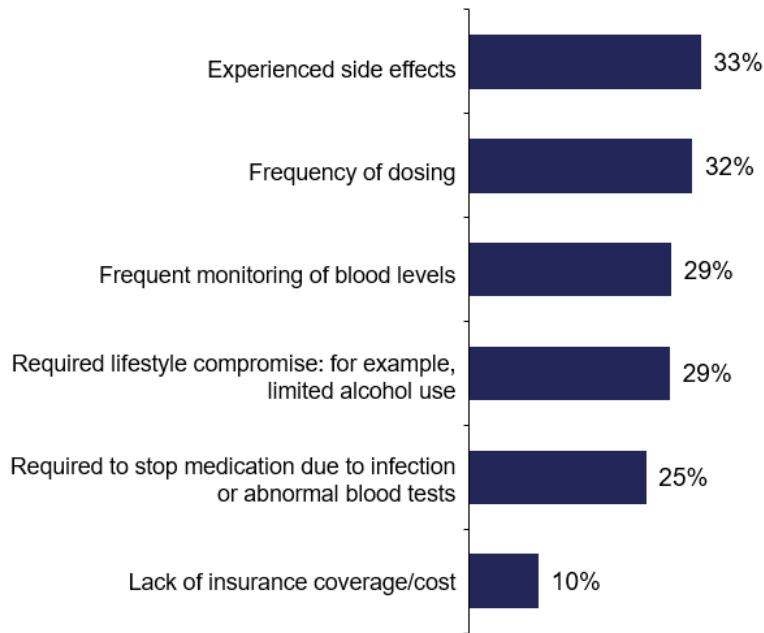

n=1,392

## Supplementary Material

### C. Injectable or Intravenous

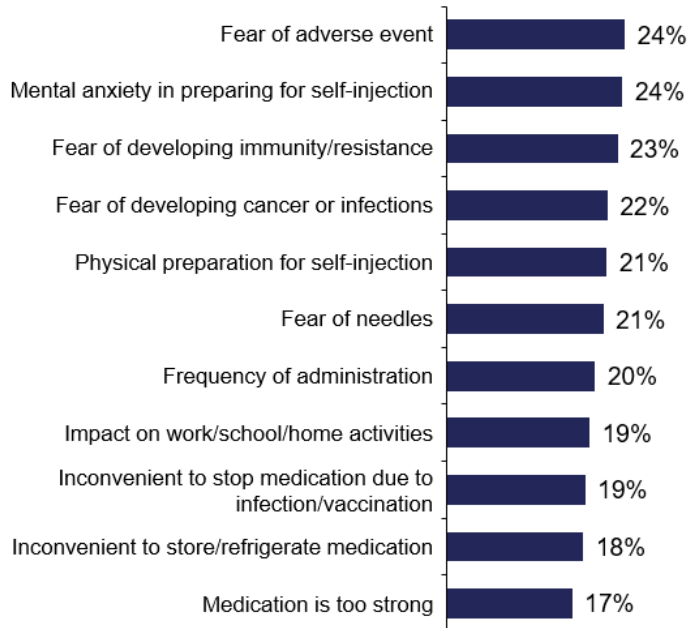

n=1,200

Patients could select more than one reason. Response options also included “other” and “don’t know/not sure”.

PsO=psoriasis.

### Supplementary Figure 5. Reasons for Discontinuing Prior A) Oral and B) Injectable or Intravenous PsO Treatments

A. Oral

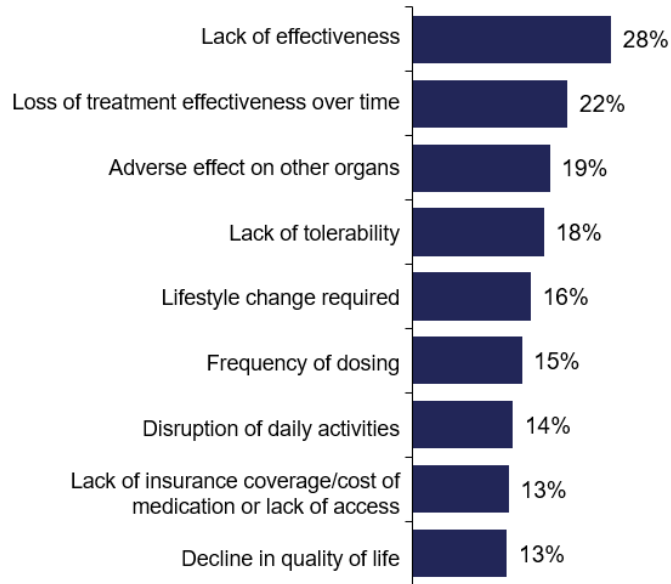

n=1,208

B. Injectable or Intravenous

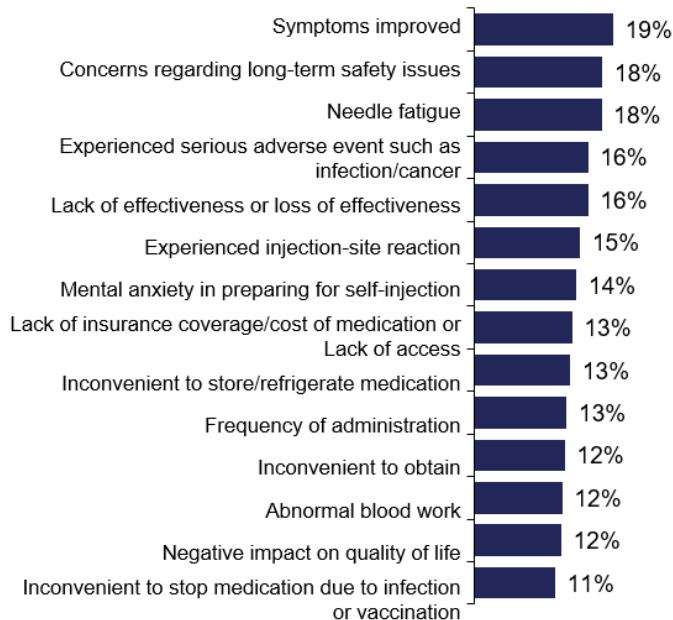

n=817

Patients could select more than one reason. Response options also included “other” and “don’t know/not sure”.

PsO=psoriasis.
